# Supplementary material
Source: PubMed Central journal article supplement (PMC2633123)
Supplement: NIHMS83945-supplement-01.pdf [file NIHMS83945-supplement-01.pdf]

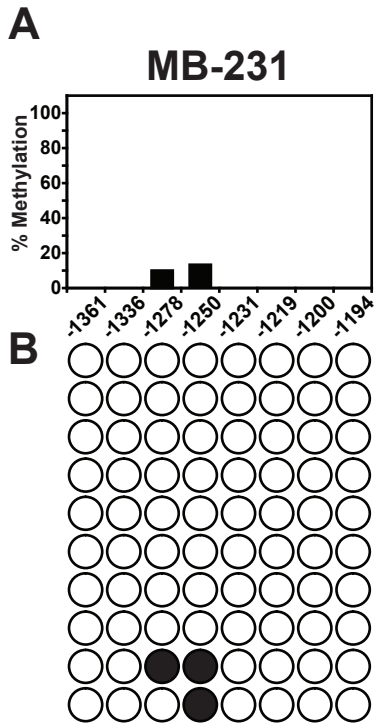

Supplemental Figure 1. Decreased MnSOD expression in MB-231 is not associated with DNA hypermethylation status. **(A)** The cytosine methylation frequency histograms for the region analyzed in MB-231. **(B)** Location and methylation status of eight CpG sites in the *SOD2* 5' regulatory region analyzed for 10 individual clones (○ unmethylated CpG sites, ● methylated CpGs).

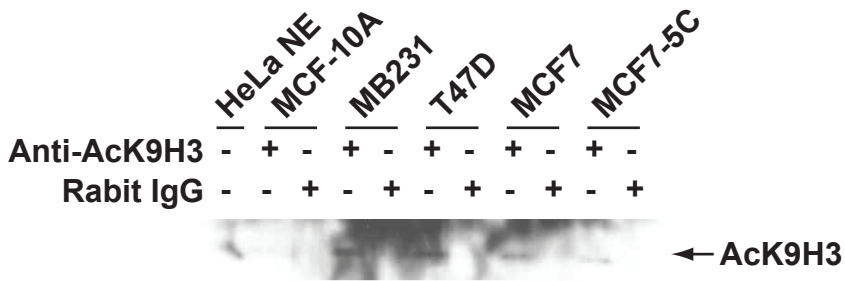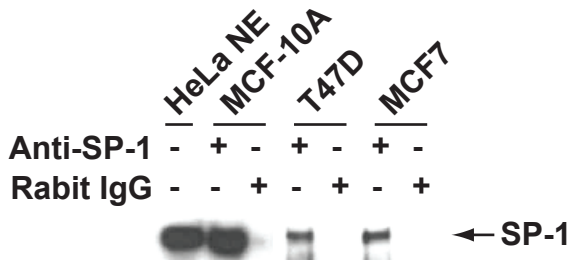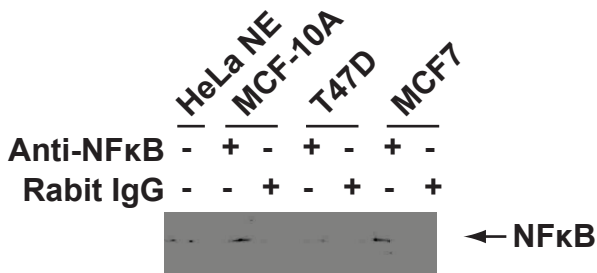

Table S1. Tukey's multiple comparison analyses of differences between histone modifications and chromatin accessibility at the SOD2 locus between MCF-10A and the indicated breast cancer cell lines. P values given are significance for each cell line compared to MCF-10A at the seven SOD2 amplicons, and GAPDH promoter.

**Dimethyl H3K4**

|         | A1       | A2        | A3       | A4       | A5        | A6        | A7       | GAPDH    |
|---------|----------|-----------|----------|----------|-----------|-----------|----------|----------|
| MB-231  | P < 0.01 | P < 0.001 | P < 0.05 | P < 0.05 | P < 0.05  | P < 0.001 | P < 0.05 | P > 0.05 |
| T47D    | P < 0.01 | P < 0.001 | P < 0.01 | P < 0.01 | P < 0.001 | P < 0.001 | P < 0.01 | P > 0.05 |
| MCF7    | P < 0.01 | P < 0.001 | P < 0.01 | P < 0.01 | P < 0.001 | P < 0.001 | P < 0.01 | P > 0.05 |
| MCF7-5C | P < 0.05 | P < 0.001 | P < 0.05 | P < 0.05 | P < 0.001 | P < 0.001 | P < 0.05 | P > 0.05 |

**Acetyl H3K9**

|         | A1       | A2        | A3        | A4        | A5       | A6       | A7        | GAPDH    |
|---------|----------|-----------|-----------|-----------|----------|----------|-----------|----------|
| MB-231  | P > 0.05 | P > 0.05  | P < 0.01  | P < 0.05  | P > 0.05 | P > 0.05 | P < 0.01  | P > 0.05 |
| T47D    | P < 0.05 | P < 0.001 | P < 0.001 | P < 0.001 | P > 0.05 | P < 0.05 | P < 0.001 | P > 0.05 |
| MCF7    | P > 0.05 | P < 0.01  | P < 0.001 | P < 0.001 | P > 0.05 | P > 0.05 | P < 0.001 | P > 0.05 |
| MCF7-5C | P > 0.05 | P < 0.01  | P < 0.001 | P < 0.001 | P < 0.05 | P < 0.05 | P < 0.01  | P > 0.05 |

**Chromatin Accessibility**

|         | A1       | A2        | A3        | A4        | A5        | A6       | A7        | GAPDH    |
|---------|----------|-----------|-----------|-----------|-----------|----------|-----------|----------|
| MB-231  | P > 0.05 | P < 0.05  | P < 0.01  | P < 0.05  | P < 0.01  | P < 0.05 | P < 0.001 | P > 0.05 |
| T47D    | P > 0.05 | P < 0.001 | P < 0.01  | P < 0.01  | P < 0.001 | P < 0.05 | P < 0.001 | P > 0.05 |
| MCF7    | P > 0.05 | P < 0.001 | P < 0.001 | P < 0.001 | P < 0.001 | P < 0.05 | P < 0.001 | P > 0.05 |
| MCF7-5C | P > 0.05 | P < 0.01  | P < 0.01  | P < 0.01  | P < 0.05  | P < 0.05 | P < 0.01  | P > 0.05 |
